# Supplementary material
Source: publisher figshare collection journal article supplement (https://frontiersin.figshare.com/ndownloader/files/26425517)
Supplement: Supplementary file 1 [file 26425517]

**Supplementary Table S5.**Summary of ecological survey data, averaged by region in Kenting National Park (see Main text Figure 1A for map of regions). The highest value of each column is indicated in bold. Note: Mean living coral cover is calculated as the average coral cover in each region between the years 2010 and 2016.

| Region | Coral Diversity  (Simpson’s index) | Coral Recruitment (colony number/m2) | Coral Species Richness  (No. species) | Macroalgae Cover (%) | Relative biomass of total fish (cm3) | Coral Recovery Rate (% change) | Mean Living Coral Cover, between  2010–2016 (%) |
| --- | --- | --- | --- | --- | --- | --- | --- |
| WC | **0.876** | **3.00** | 36.4 | 0.089 | 251.4 | 189.2 | 26.5 |
| WN | 0.852 | 2.56 | 42.2 | 0.203 | 536.4 | -21.3 | **61.0** |
| IN | 0.851 | 2.88 | **47.1** | 0.188 | **643.6** | **494.3** | 33.8 |
| EN | 0.857 | 2.82 | 40.8 | 0.352 | 178.9 | 115.2 | 27.7 |
| EC | 0.738 | 2.80 | 27.4 | **0.446** | 155.0 | -38.6 | 27.1 |
